## Office-Based Buprenorphine Treatment of Opioid Use Disorder, Second Edition

Edited by John A. Renner Jr., M.D.,  
Petros Levounis, M.D., M.A., and  
Anna T. LaRose, M.D.

This new edition of *Office-Based Buprenorphine Treatment* has been updated to reflect DSM-5 language, and two additional chapters have been included: one that addresses other pharmacotherapies useful in treating OUD, including methadone and naltrexone, and another that discusses OUD treatment specifically with regard to women's health and pregnancy.

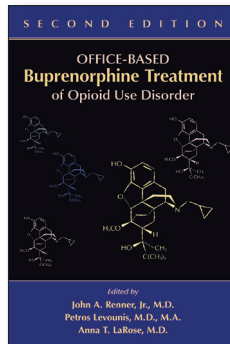

2018 • 395 pages • ISBN 978-1-61537-083-2 • Paperback • \$79.00 • Item #37083  
2018 • 395 pages • ISBN 978-1-61537-170-9 • eBook • \$63.00 • Item #37170

AMERICAN  
PSYCHIATRIC  
ASSOCIATION  
PUBLISHING

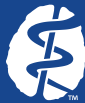

Order @ [www.appi.org](http://www.appi.org)  
Email: [appi@psych.org](mailto:appi@psych.org)  
Phone: 1-800-368-5777

AH1813A

## Our Work Matters

Hope. Recovery. Wellbeing.

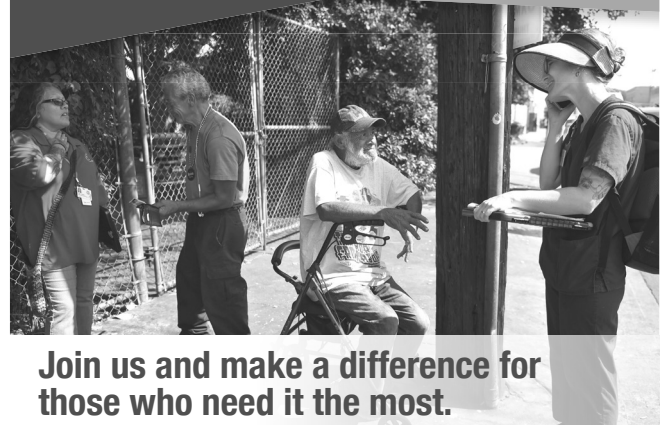

### Join us and make a difference for those who need it the most.

Los Angeles County Department of Mental Health is a nationally recognized leader providing a wide range of services to one of the largest populations in the country. We invite you to join our team as we help the most vulnerable in our community find a path to independence and personal recovery.

Starting annual salary immediately post residency completion is **\$233,784** with **potential bonuses of \$32,000 annually**. Student **loan repayment** and recruitment incentives available.

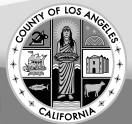

[www.psychiatristjobs.la](http://www.psychiatristjobs.la)

Visit [ps.psychiatryonline.org](http://ps.psychiatryonline.org) for these features!

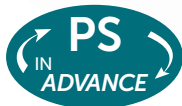

Discover the latest research before it appears in print

**A Systematic Review of the Attributes and Outcomes of Peer Work and Guidelines for Reporting Studies of Peer Interventions**

**State Legislators' Practices for Seeking Information About Behavioral Health Research and Preferences for Dissemination**

Psychiatric  
Services  
**FROM PAGES  
TO PRACTICE**

Listen to our podcast, ***Psychiatric Services From Pages to Practice***, and learn about the latest mental health services research and why it is relevant.

**Episode 13:** An interview with Dror Ben-Zeev, Ph.D., on a comparative effectiveness trial of a mobile mental health (mHealth) app versus a clinic-based group intervention (WRAP)

Sign up (<http://appi.org/etocs>) to receive alerts as soon as new content is available.

AMERICAN  
PSYCHIATRIC  
ASSOCIATION  
PUBLISHING

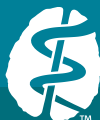

[ps.psychiatryonline.org](http://ps.psychiatryonline.org)

[www.appi.org](http://www.appi.org) • 1-800-368-5777 • e-mail: [appi@psych.org](mailto:appi@psych.org)

Keep up with the latest from *Psychiatric Services* on Facebook ([facebook.com/PsychiatryOnline](https://facebook.com/PsychiatryOnline)) and Twitter (@APAPubPsychSvcs).

*The Newest Addition to APA Publishing's Portfolio of Journals*

# The American Journal of Psychotherapy

[psychotherapy.psychiatryonline.org](http://psychotherapy.psychiatryonline.org)

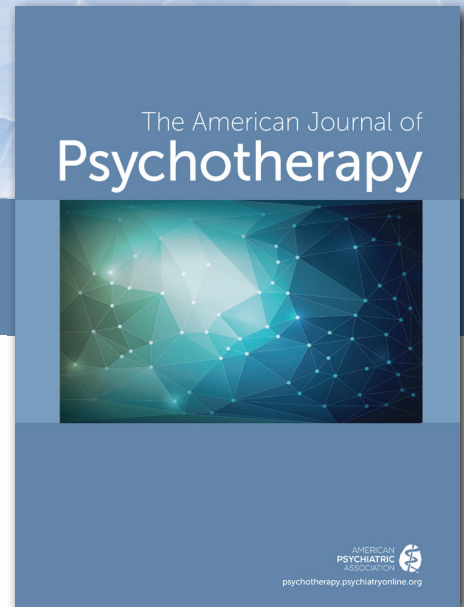

## Holly A. Swartz, M.D., Editor-in-Chief

*The American Journal of Psychotherapy* is a peer-reviewed, interdisciplinary journal published quarterly by the American Psychiatric Association. Begun in 1947 by the Association for the Advancement of Psychotherapy, *The American Journal of Psychotherapy* provides a forum for advancing the theory, science, and clinical practice of psychotherapy, publishing articles that expand the understanding of psychotherapies, especially in the domains of efficacy, process, education, and practice.

The journal publishes empirical papers on psychotherapy outcomes, process, measurement, and education. Maintaining a strong clinical focus, it welcomes case reports, review articles, and training tools that will guide and shape clinical practice.

*The American Journal of Psychotherapy* invites a broad range of perspectives from all psychotherapy disciplines, including but not limited to psychodynamic, interpersonal, cognitive- or dialectical-behavioral, existential, emotion-focused, problem-solving, mentalizing, mindfulness-based, and client-centered approaches.

*The American Journal of Psychotherapy* inclusively addresses topics across treatment modalities, age groups, genders, races and ethnicities, and diagnoses. The journal serves the international community by curating a vibrant, pluralistic, dialogue about psychotherapy that ultimately will inform clinical care.

2018 • Vol. 71  
Frequency: Quarterly  
Online ISSN: 2575-6559  
[psychotherapy.psychiatryonline.org](http://psychotherapy.psychiatryonline.org)

**Subscribe Now!** .....

 **Visit [appi.org](http://appi.org) for pricing and more information!**
