# Psychiatric Services

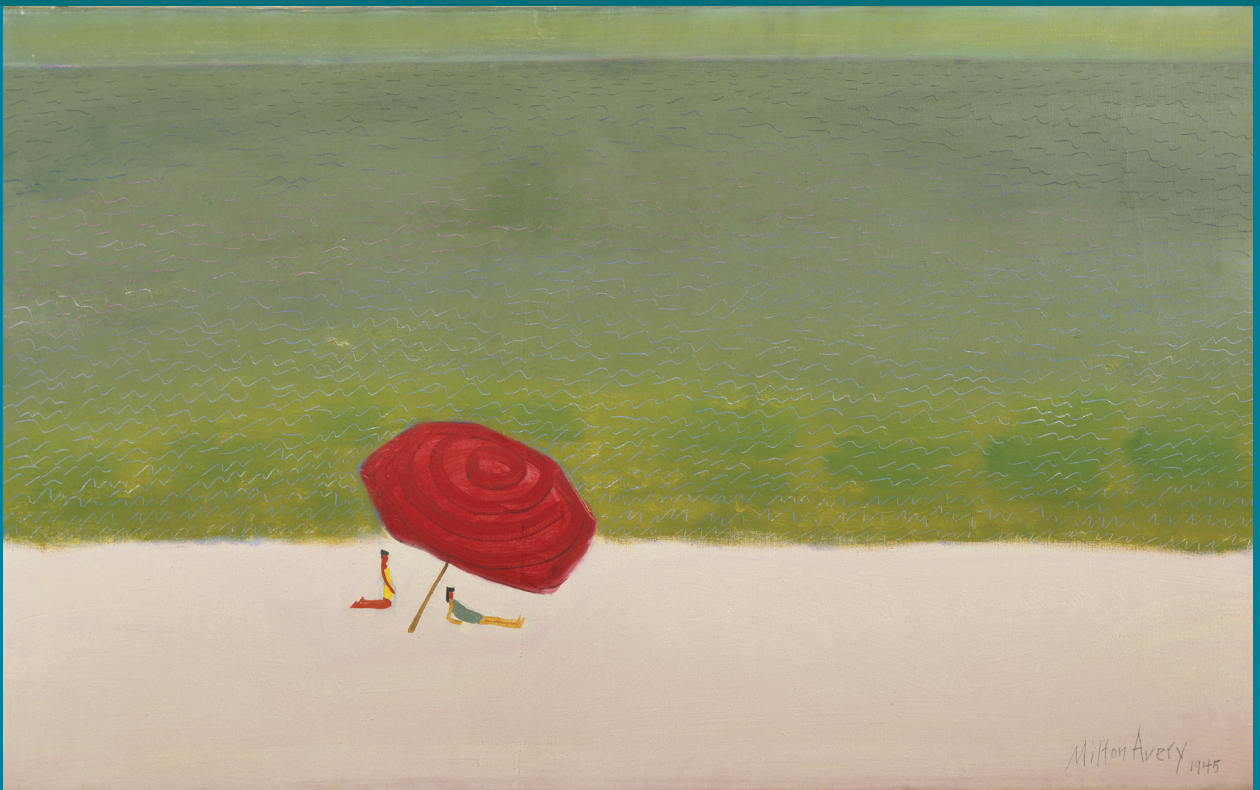

Contact with mental health services prior to suicide

Using peer mentor intervention to curb recurrent hospitalization: an RCT

Specialist mental health care in Lebanon and mobile mental health for Ghana

Taking legal histories in psychiatric assessments
